# Supplementary material for: Improving the performance of photovoltaic cells based on nanocomposites with contorted polycyclic aromatic hydrocarbon additive in bulk heterojunction
Source: Royal Society of Chemistry journal article supplement (doi:10.1039/d1tc02932k), 2021-01-01
Supplement: d1tc02932k1.pdf [file d1tc02932k1.pdf]

## Supplementary Information

### Improving the performance of photovoltaic cells based on nanocomposites with contorted polycyclic aromatic hydrocarbon additive in bulk heterojunction

Jaehyeon Lee<sup>a,b,1</sup>, Jaeho Shim<sup>a,1</sup>, Joo Song Lee<sup>a</sup>, Chel-Jong Choi<sup>b</sup>, Sang-Youp Yim<sup>c</sup>,  
Yeonghoon Jin<sup>d</sup>, Kyoungsik Yu<sup>d</sup>, Young Jae Park<sup>e</sup>, Seokhoon Ahn<sup>a,f</sup>, and Dong Ick Son<sup>a,g\*</sup>

<sup>a</sup>Institute of Advanced Composite Materials, Korea Institute of Science and Technology, 92  
Chudong-ro, Bongdong-eup, Wanju-gun, Jeollabuk-do 55324, Republic of Korea

<sup>b</sup>School of Semiconductor and Chemical Engineering, Semiconductor Physics Research Center  
(SPRC), Chonbuk National University, Jeonju 561-756, Republic of Korea

<sup>c</sup>Advanced Photonics Research Institute, Gwangju Institute of Science and Technology, 123,  
Cheomdangwagi-ro, Buk-gu, Gwangju 61005, Republic of Korea

<sup>d</sup>School of Electrical Engineering, Korea Advanced Institute of Science and Technology, 291  
Daehak-ro, Yuseong-gu, Daejeon 34141, Republic of Korea

<sup>e</sup>Light Convergence Research Team, Korea Institute of Lighting and ICT, 370 Dongseo-ro,  
Iksan-si, Jeollabuk-do 54630, Republic of Korea

<sup>f</sup>Department of Chemistry, Jeonbuk National University, 567 Baekje-daero, Deokjin-gu,  
Jeonju, Jeollabuk-do 54896, Republic of Korea

<sup>g</sup>KIST School, Department of Nanomaterials and Nano Science, University of Science and  
Technology (UST), 217, Gajeong-ro, Yuseong-gu, Daejeon 34113, Republic of Korea

Keywords: Bulk heterojunction, Solid additive, Inverted Polymer Solar Cells, Contorted  
polycyclic aromatic hydrocarbon

#### **Table of Contents**

---

\* Corresponding authors. E-mail: eastwing33@kist.re.kr (D. I. Son) Tel.: +82 632198155; fax: +82 632198129.

<sup>1</sup>These authors contributed equally to this work.

- 1. The J–V characteristics of the iPSCs based on PTB7:PC<sub>71</sub>BM bulk heterojunction with and without the 4Cl-cHBC additives.**
- 2. Photovoltaic performances of the iPSCs based on PTB7:PC<sub>71</sub>BM bulk heterojunction with and without the 4Cl-cHBC additives.**
- 3. The fitting plot of J–V characteristics by space-charge limited current (SCLC) model**
- 4. Energy level diagram of the iPSCs based on PTB7-Th:PC<sub>71</sub>BM bulk heterojunction with the 4Cl-cHBC additives.**

- 1. The J–V characteristics of the iPSCs based on the PTB7-Th:PC<sub>71</sub>BM bulk**

heterojunction with and without the 4Cl-cHBC additives.

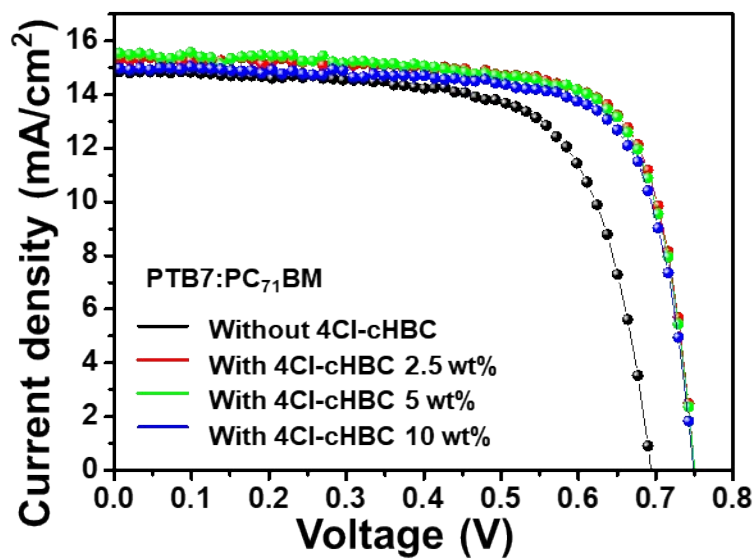

**Figure S1.** The J–V characteristics of the iPSCs based on PTB7:PC<sub>71</sub>BM bulk heterojunction with and without the 4Cl-cHBC additive under the illumination (AM1.5).

2. Photovoltaic performances of the iPSCs based on the PTB7:PC<sub>71</sub>BM bulk

**heterojunction with and without the 4Cl-cHBC additives.**

| Active layer                                      | $V_{oc}$ (V)<br>“avg.” | $J_{sc}$ (mA cm <sup>-2</sup> )<br>“avg.” | FF<br>“avg.”       | PCE (%)<br>“avg.” |
|---------------------------------------------------|------------------------|-------------------------------------------|--------------------|-------------------|
| PTB7:PC71BM                                       | 0.692<br>“0.693”       | 14.838<br>“14.679”                        | 69.865<br>“70.101” | 7.176<br>“7.128”  |
| PTB7:PC <sub>71</sub> BM<br>with 4Cl-cHBC 2.5 wt% | 0.748<br>“0.747”       | 15.345<br>“15.389”                        | 75.524<br>“74.340” | 8.673<br>“8.550”  |
| PTB7:PC <sub>71</sub> BM<br>with 4Cl-cHBC 5 wt%   | 0.749<br>“0.748”       | 15.525<br>“15.292”                        | 74.204<br>“73.527” | 8.625<br>“8.406”  |
| PTB7:PC <sub>71</sub> BM<br>with 4Cl-cHBC 10 wt%  | 0.747<br>“0.746”       | 14.988<br>“14.706”                        | 74.571<br>“74.320” | 8.348<br>“8.154”  |

**Table S1.** Photovoltaic performances of the iPSCs based on the PTB7:PC<sub>71</sub>BM bulk heterojunction with and without the 4Cl-cHBC additives.

### **3. The fitting plot of J–V characteristics by space-charge limited current (SCLC) model**

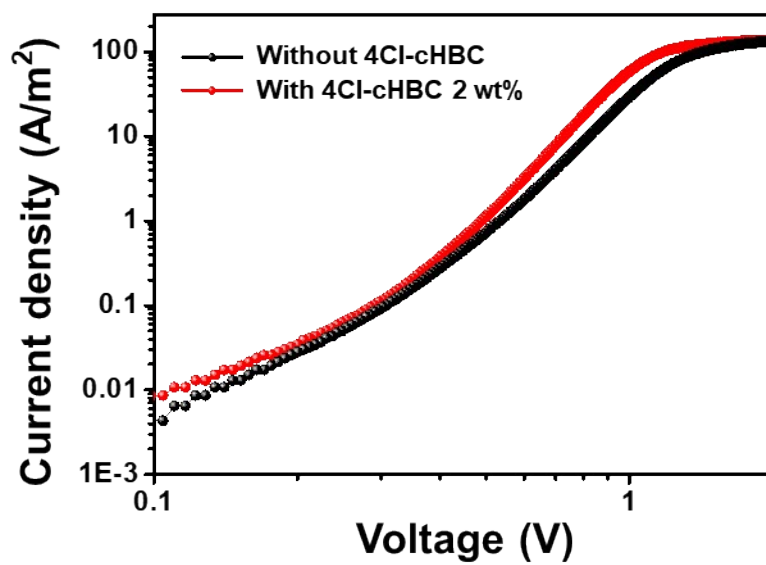

**Figure S2.** The fitting plot of J–V characteristics by space-charge-limited-current (SCLC) model in the electron-only device based on PTB7-Th:PC<sub>71</sub>BM bulk heterojunction with and without the 4Cl-cHBC additive.

4. Energy level diagram of the iPSCs based on the PTB7-Th:PC<sub>71</sub>BM bulk heterojunction with the 4Cl-cHBC additives.

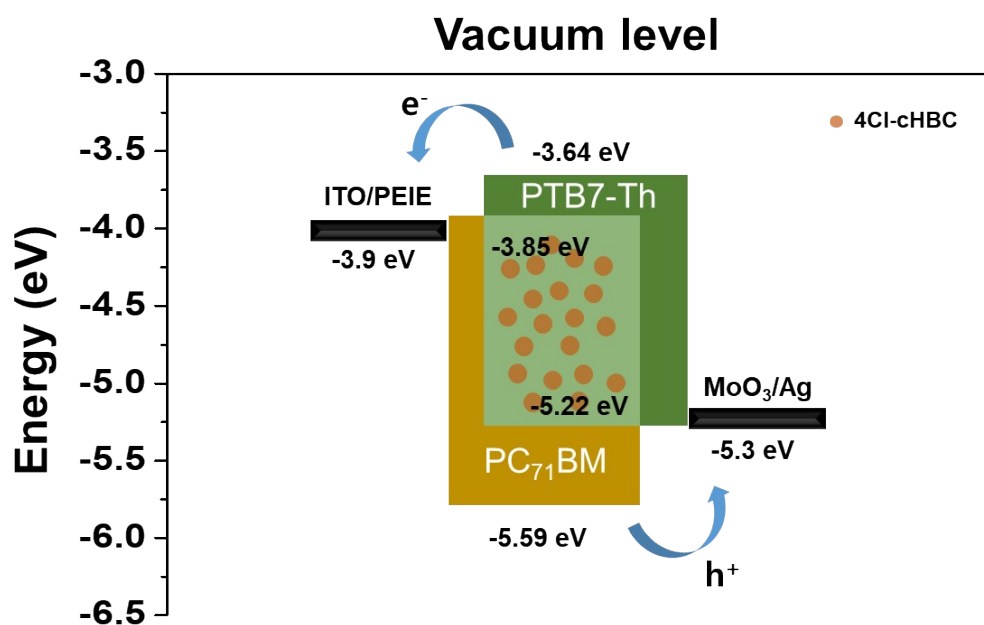

**Figure S3.** Energy level diagram of the iPSCs based on the PTB7-Th:PC<sub>71</sub>BM bulk heterojunction with the 4Cl-cHBC additives highlighting pathways for charge generation and transport.
